## Role of Hypothalamic Proopiomelanocortin Neuron Autophagy in the Control of Appetite and Leptin Response

Wenyang Quan,\* Hyun-Kyong Kim,\* Eun-Yi Moon, Su Sung Kim, Cheol Soo Choi, Masaaki Komatsu, Yeon Taek Jeong, Moon-Kyu Lee, Kwang-Won Kim, Min-Seon Kim, and Myung-Shik Lee

Department of Medicine (W.Q., Y.T.J., M.-K.L., K.-W.K., M.-S.L.), Samsung Medical Center, and Samsung Advanced Institute for Health Science and Technology (M.-S.L.), Sungkyunkwan University School of Medicine, Seoul 135-710, Korea; Asan Institute for Life Sciences (H.-K.K., M.-S.K.) and Department of Internal Medicine (M.-S.K.), Asan Medical Center, University of Ulsan College of Medicine, Seoul 138-736, Korea; Department of Bioscience and Biotechnology (E.-Y.M.), Sejong University, Seoul 143-747, Korea; Lee Gil Ya Cancer and Diabetes Institute (S.S.K., C.S.C.) and Division of Endocrinology (C.S.C.), Gil Medical Center, Gachon University of Medicine and Science, Incheon 405-760, Korea; and Laboratory of Frontier Science (M.K.), Tokyo Metropolitan Institute of Medical Science, Tokyo 156-8506, Japan

Autophagy is a catabolic cellular process involving the degradation of the cell's own components. Although the role of autophagy of diverse tissues in body metabolism has been investigated, the importance of autophagy in hypothalamic proopiomelanocortin (POMC) neurons, key regulators of energy balance, has not been addressed. The role of autophagy in leptin sensitivity that is critical for the control of body weight and appetite has also not been investigated. We produced mice with specific deletion of *autophagy-related 7 (Atg7)*, an essential autophagy gene, in hypothalamic POMC neurons (*Atg7<sup>ΔPOMC</sup>* mice). *Atg7* expression was deficient in the arcuate nucleus of the hypothalamus of *Atg7<sup>ΔPOMC</sup>* mice. p62, a specific substrate of autophagy, accumulated in the hypothalamus of *Atg7<sup>ΔPOMC</sup>* mice, which colocalized with ubiquitin. *Atg7<sup>ΔPOMC</sup>* mice had increased body weight due to increased food intake and decreased energy expenditure. *Atg7<sup>ΔPOMC</sup>* mice were not more prone to diet-induced obesity compared with control mice but more susceptible to hyperglycemia after high-fat diet. The ability of leptin to suppress fasting-elicited hyperphagia and weight gain during refeeding was attenuated in *Atg7<sup>ΔPOMC</sup>* mice. Deficient autophagy did not significantly affect POMC neuron number but impaired leptin-induced signal transducer and activation of transcription 3 activation. Our findings indicate a critical role for autophagy of POMC neurons in the control of energy homeostasis and leptin signaling. (*Endocrinology* 153: 1817–1826, 2012)

**M**acroautophagy (here referred to as autophagy) is basically a catabolic process involving the degradation of the cell's own components and involves the rearrangement of subcellular membranes to sequester cytoplasm and organelles for delivery to lysosomes, where the sequestered material is degraded and recycled (1). The

main purposes of autophagy are quality control of organelles or cellular proteins in the basal state and protection of intracellular homeostasis in the case of energy failure or nutrient deficiency (2). Hence, deficiency of autophagy would render cells precarious both in static and stressed conditions.

ISSN Print 0013-7227 ISSN Online 1945-7170

Printed in U.S.A.

Copyright © 2012 by The Endocrine Society

doi: 10.1210/en.2011-1882 Received October 14, 2011. Accepted January 25, 2012.

First Published Online February 14, 2012

\* W.Q. and H.-K.K. contributed equally to this work.

Abbreviations: Ab, Antibody; ARC, arcuate nucleus; *Atg7*, *autophagy-related 7*; Bip, binding immunoglobulin protein; CHOP, C/EBP homologous protein; EE, energy expenditure; eIF2 $\alpha$ , eukaryotic initiation factor 2  $\alpha$ ; ER, endoplasmic reticulum; HFD, high-fat diet; icv, intracerebroventricular; IPGTT, ip glucose tolerance test; mTOR, mammalian target of rapamycin; NF- $\kappa$ B, nuclear factor  $\kappa$ B; PERK, PKR-like ER kinase; POMC, proopiomelanocortin; shRNA, short hairpin RNA; STAT3, signal transducer and activation of transcription 3.

We and others have reported that autophagy is important in the maintenance of pancreatic  $\beta$ -cell mass, structure, and function (3, 4). Autophagy has been shown to be involved in adipogenesis (5, 6). The effect of hypothalamic agouti-related peptide neuron-specific disruption of *autophagy-related 7* (*Atg7*), an essential autophagy gene, has also been studied, showing a lean phenotype accompanied by increases in hypothalamic proopiomelanocortin (POMC) and its cleavage product,  $\alpha$ -MSH levels (7). In contrast, *Atg7* knockdown by short hairpin RNA (shRNA) delivery to the mediobasal hypothalamus resulted in obesity associated with activation of I  $\kappa$ B kinase  $\beta$  IKK $\beta$ /nuclear factor  $\kappa$ B (NF- $\kappa$ B) pathway (8). However, the role for autophagy in hypothalamic POMC neurons that are critical for the control of appetite and body weight has not been investigated. The role of autophagy in leptin sensitivity and signaling that play an important role in the central and peripheral energy homeostasis (9) has also not been explored. Here, we report that autophagy deficiency in hypothalamic POMC neurons, the major regulator of energy intake, leads to obesity and leptin resistance, suggesting that hypothalamic autophagy plays an important role in the control of appetite or body weight and leptin signaling.

## Materials and Methods

### Mice

*Atg7*<sup>F/W</sup> mice of C57BL/6 background were crossed to POMC-*Cre*<sup>+</sup> mice of C57BL/6 background (kindly provided by J. K. Elmquist) to generate mice with POMC neuron-specific *Atg7* deletion (*Atg7* <sup>$\Delta$ POMC</sup> mice). *Cre*-mediated recombination was confirmed by PCR using genomic DNA from the arcuate nucleus (ARC) and primers flanking the floxed region (forward, TGGCTGCTACTTCTGCAATGATGT; reverse, CTAAGCAGGTGAGATCTCACTCA). Blood glucose levels and body weight were monitored weekly. Intraperitoneal glucose tolerance test (IPGTT) was performed as described (4). For intracerebroventricular (icv) administration of leptin, cannulae were implanted into the third ventricle of mice (1.8 mm caudal to the bregma and 5.0 mm ventral to the sagittal sinus) as described (10). After a 7-d recovery period and an overnight fast, 2  $\mu$ l of 0.9% saline or 3  $\mu$ g of leptin (R&D Systems, Minneapolis, MN) were administered. For some experiments, mice were fed 60% high-fat diet (HFD) (Research Diets, Inc., New Brunswick, NJ) since 3.5 wk of age.

All animal experiments were conducted in accordance with the institutional guidelines of Samsung Medical Center. This project was approved by the Institutional Animal Care and Use Committee of Samsung Medical Center.

### Reverse transcription-polymerase chain reaction

RNA was prepared from punch biopsies of the ARC using TRIzol Reagent (Invitrogen, Carlsbad, CA). cDNA was synthesized using Superscript II (Invitrogen) and oligo(dT)<sub>12–18</sub> primer. *Atg7*

expression was examined by real-time RT-PCR using total RNA from the ARC and specific primers (forward, ATGCCAGGACAC-CCTGTGAACTTC; reverse, CAGGACAGAGACCATCAGCT-CCAC). POMC expression in the ARC was evaluated by real-time RT-PCR using specific primers (forward, CAGGTCCTGGAGTC-CGAC; reverse, CATGAAGCCACCGTAACG).

### Western blotting

Tissue lysate of the mediobasal hypothalamus was prepared as described (10), and Western blotting was conducted using anti-p62 (Progen, Heidelberg, Germany), anti-binding immunoglobulin protein (BiP) (Stressgen, Antwerp, Belgium), anti-C/EBP homologous protein (CHOP) (Santa Cruz Biotechnology, Inc., Santa Cruz, CA), or anti-eukaryotic initiation factor 2  $\alpha$  (eIF2 $\alpha$ ) (Cell Signaling, Danvers, MA) antibodies (Ab).

### Body composition and energy expenditure (EE)

Fat and lean body mass were measured by an <sup>1</sup>H minispec system (LF90II; Bruker Optik, Billerica, MA). Activity, food consumption, and EE were assessed in a metabolic monitoring system (Comprehensive Lab Animal Monitoring System; Columbus Instruments, Columbus, OH) for 4 d (2 d of acclimation followed by 2 d of measurement) as previously described (11). EE was calculated from the gas exchange data. Locomotor activity was measured by counting the number of infrared beam breaks on x- and z-axes during the measurement period.

### Measurement of hormone levels

Serum levels of leptin (R&D Systems) and insulin (Shibayagi Co., Gunma, Japan) were measured using commercial ELISA kits. Fasting serum cortisol level was measured using a RIA kit (Immunotech, Marseille, France).

### Confocal microscopy

Accumulation of p62 in the ARC of the hypothalamus was evaluated using a previously reported protocol with modifications (4). Briefly, frozen hypothalamic sections were incubated with anti- $\beta$ -endorphin Ab (Phoenix Pharmaceuticals, Belmont, CA), followed by incubation with Alexa Fluor 555-labeled anti-rabbit IgG (Invitrogen). Sections were further incubated with anti-p62, then with fluorescein isothiocyanate-labeled anti-guinea pig IgG (Zymed, San Francisco, CA). For colocalization of p62 and ubiquitin, anti-p62 Ab-stained sections were incubated with antiubiquitin Ab (Dako, Carpinteria, CA), then with Alexa Fluor 568-labeled anti-rabbit IgG (Invitrogen). The number of POMC neurons was estimated using a previously reported method with modifications (12). Briefly, after immunofluorescent staining of POMC neurons using anti- $\beta$ -endorphin Ab as above, sections were stained with 4',6-diamidino-2-phenylindole. The number of  $\beta$ -endorphin<sup>+</sup> cells in the rostral, middle, and caudal ARC was counted by confocal microscopy. Leptin signaling in POMC neurons of the ARC was examined by studying signal transducer and activation of transcription 3 (STAT3) phosphorylation. Fresh frozen hypothalamic sections were prepared 30 min after icv administration of leptin. After staining with anti- $\alpha$ -MSH Ab (Millipore, Billerica, MA) and then with Alexa Fluor 488-labeled anti-sheep IgG, hypothalamic sections were incubated with p-STAT3 Ab (Cell Signaling). Additional incubation with Alexa Fluor 546-labeled anti-rabbit IgG was performed for confocal microscopy. Here, anti- $\alpha$ -MSH Ab was used

instead of anti- $\beta$ -endorphin Ab to avoid the use of the same secondary Ab (antirabbit IgG). Accumulation of Bip or CHOP was examined by sequential immunofluorescent staining of frozen hypothalamic sections using anti-Bip Ab (Cell Signaling) and anti- $\alpha$ -MSH Ab or anti-CHOP Ab (Santa Cruz Biotechnology, Inc.) and anti- $\beta$ -endorphin Ab as the primary Ab, followed by confocal microscopy. Activation of PKR-like ER kinase (PERK) or eIF2 $\alpha$  was evaluated by sequential immunofluorescent staining of frozen hypothalamic sections using anti-p-PERK (Santa Cruz Biotechnology, Inc.) and anti- $\alpha$ -MSH Ab or anti-p-eIF2 $\alpha$  (Cell Signaling) and anti- $\alpha$ -MSH Ab as the primary Ab, again followed by confocal microscopy.

### Statistical analysis

Data are expressed as means  $\pm$  SE from multiple measurements. Two-tailed Student's *t* test was employed to compare values between two groups. Repeated-measures ANOVA using linear mixed model was employed to compare repeated measurements between groups or interaction between variables. *P* < 0.05 was considered significant.

## Results

### Generation of POMC neuron-specific autophagy-deficient mice

To derive POMC-specific autophagy-deficient mice, we bred *Atg7*-floxed mice (*Atg7*<sup>F/W</sup>) with POMC-*Cre*<sup>+</sup> mice (13) that express Cre recombinase specifically in POMC neurons. Deletion of floxed *Atg7* segment in POMC-*Cre*<sup>+</sup>; *Atg7*<sup>F/F</sup> (*Atg7* <sup>$\Delta$ POMC</sup>) mice was confirmed by PCR analysis using genomic DNA from the ARC of the hypothalamus (Fig. 1A). Floxed *Atg7* allele in *Atg7* <sup>$\Delta$ POMC</sup> mice was from neurons other than POMC neurons in the ARC. *Atg7* mRNA expression in the ARC assessed by real-time RT-PCR was significantly reduced in *Atg7* <sup>$\Delta$ POMC</sup> mice compared with littermate control POMC-*Cre*<sup>+</sup>; *Atg7*<sup>F/F</sup> (*Atg7*<sup>F/F</sup>) mice (*P* < 0.001). Residual *Atg7* mRNA expression was observed in the ARC of *Atg7* <sup>$\Delta$ POMC</sup> mice due to the expression of *Atg7* mRNA in non-POMC neurons (Fig. 1B). We studied possible accumulation of p62 that is a specific substrate of autophagy (14). Western blotting showed massive accumulation of p62 in the hypothalamus of *Atg7* <sup>$\Delta$ POMC</sup> mice (Fig. 1C). Confocal microscopy revealed p62 accumulation in both punctate and diffuse patterns that colocalized with  $\beta$ -endorphin in POMC neurons (Fig. 1D). p62 also colocalized with ubiquitin in the same neurons, which is consistent with the role of p62 as an adaptor for ubiquitinated proteins in autophagosome formation (Fig. 1E) (14).

### Obesity of *Atg7* <sup>$\Delta$ POMC</sup> mice

Development of *Atg7* <sup>$\Delta$ POMC</sup> mice was apparently indistinguishable from littermate control *Atg7*<sup>F/F</sup> mice. However, body weight of male *Atg7* <sup>$\Delta$ POMC</sup> mice was increased compared with male *Atg7*<sup>F/F</sup> mice since 5 wk of age, and the

difference persisted throughout the observation period (*P* < 0.001) (Fig. 2A). In contrast, body weight of female *Atg7* <sup>$\Delta$ POMC</sup> mice appeared higher compared with female *Atg7*<sup>F/F</sup> mice, but the difference was not statistically significant (Supplemental Fig. 1, published on The Endocrine Society's Journals Online web site at <http://endo.endojournals.org>). Thus, we analyzed male *Atg7* <sup>$\Delta$ POMC</sup> and *Atg7*<sup>F/F</sup> mice throughout the study. Nuclear magnetic resonance analysis of body composition showed that the increase in body weight of *Atg7* <sup>$\Delta$ POMC</sup> mice was mostly due to an increase in fat mass (*P* < 0.001) (Fig. 2B). Lean body mass was not significantly increased in male *Atg7* <sup>$\Delta$ POMC</sup> mice compared with *Atg7*<sup>F/F</sup> mice (*P* > 0.05) (Fig. 2B). To study the mechanism underlying the increased body mass in *Atg7* <sup>$\Delta$ POMC</sup> mice, we measured food intake. Food intake was significantly higher in *Atg7* <sup>$\Delta$ POMC</sup> mice compared with *Atg7*<sup>F/F</sup> mice at 6–16 wk of age (*P* < 0.05) (Fig. 2C). We also determined EE that is regulated by hypothalamic hormones (9). EE was significantly reduced in *Atg7* <sup>$\Delta$ POMC</sup> mice compared with *Atg7*<sup>F/F</sup> mice (*P* < 0.05) (Fig. 2D), indicating that both increased food intake and decreased EE contributed to the increased body mass of *Atg7* <sup>$\Delta$ POMC</sup> mice. In contrast, locomotor activity was not different between *Atg7* <sup>$\Delta$ POMC</sup> and *Atg7*<sup>F/F</sup> mice (*P* > 0.1) (Fig. 2E), thereby eliminating the possibility that a reduction in locomotor activity contributes to the decreased EE.

Despite the increased body fat mass, nonfasting blood glucose level was not different between *Atg7* <sup>$\Delta$ POMC</sup> and *Atg7*<sup>F/F</sup> mice (*P* > 0.1) (Fig. 2F). IPGTT also revealed no difference in glucose tolerance between *Atg7* <sup>$\Delta$ POMC</sup> and *Atg7*<sup>F/F</sup> mice (*P* > 0.1) (Fig. 2G).

Because POMC and its cleavage products are also produced in corticotrophs of the pituitary gland (15), we examined whether function of corticotrophs is affected by POMC<sup>+</sup> cell-specific autophagy deficiency by measuring serum cortisol level. Fasting serum cortisol level was not different between *Atg7* <sup>$\Delta$ POMC</sup> and *Atg7*<sup>F/F</sup> mice (*P* > 0.1) (Fig. 2H), suggesting no alteration of pituitary corticotroph function in *Atg7* <sup>$\Delta$ POMC</sup> mice and no role of pituitary-adrenal hormone axis in the weight gain of *Atg7* <sup>$\Delta$ POMC</sup> mice.

We next investigated whether leptin resistance of *Atg7* <sup>$\Delta$ POMC</sup> mice predisposes the mice to diet-induced obesity. Repeated-measures ANOVA using linear mixed model showed that body weight of *Atg7* <sup>$\Delta$ POMC</sup> mice fed HFD since 3.5 wk of age was significantly higher compared with *Atg7*<sup>F/F</sup> mice fed HFD (*P* < 0.05) (Fig. 3A). However, linear mixed model analysis showed that weight gain of *Atg7* <sup>$\Delta$ POMC</sup> mice after HFD was not statistically different from that of *Atg7*<sup>F/F</sup> mice (*P* > 0.1), showing no interaction between diet-induced obesity and hypothalamic autophagy status (Fig. 3B). We next analyzed the

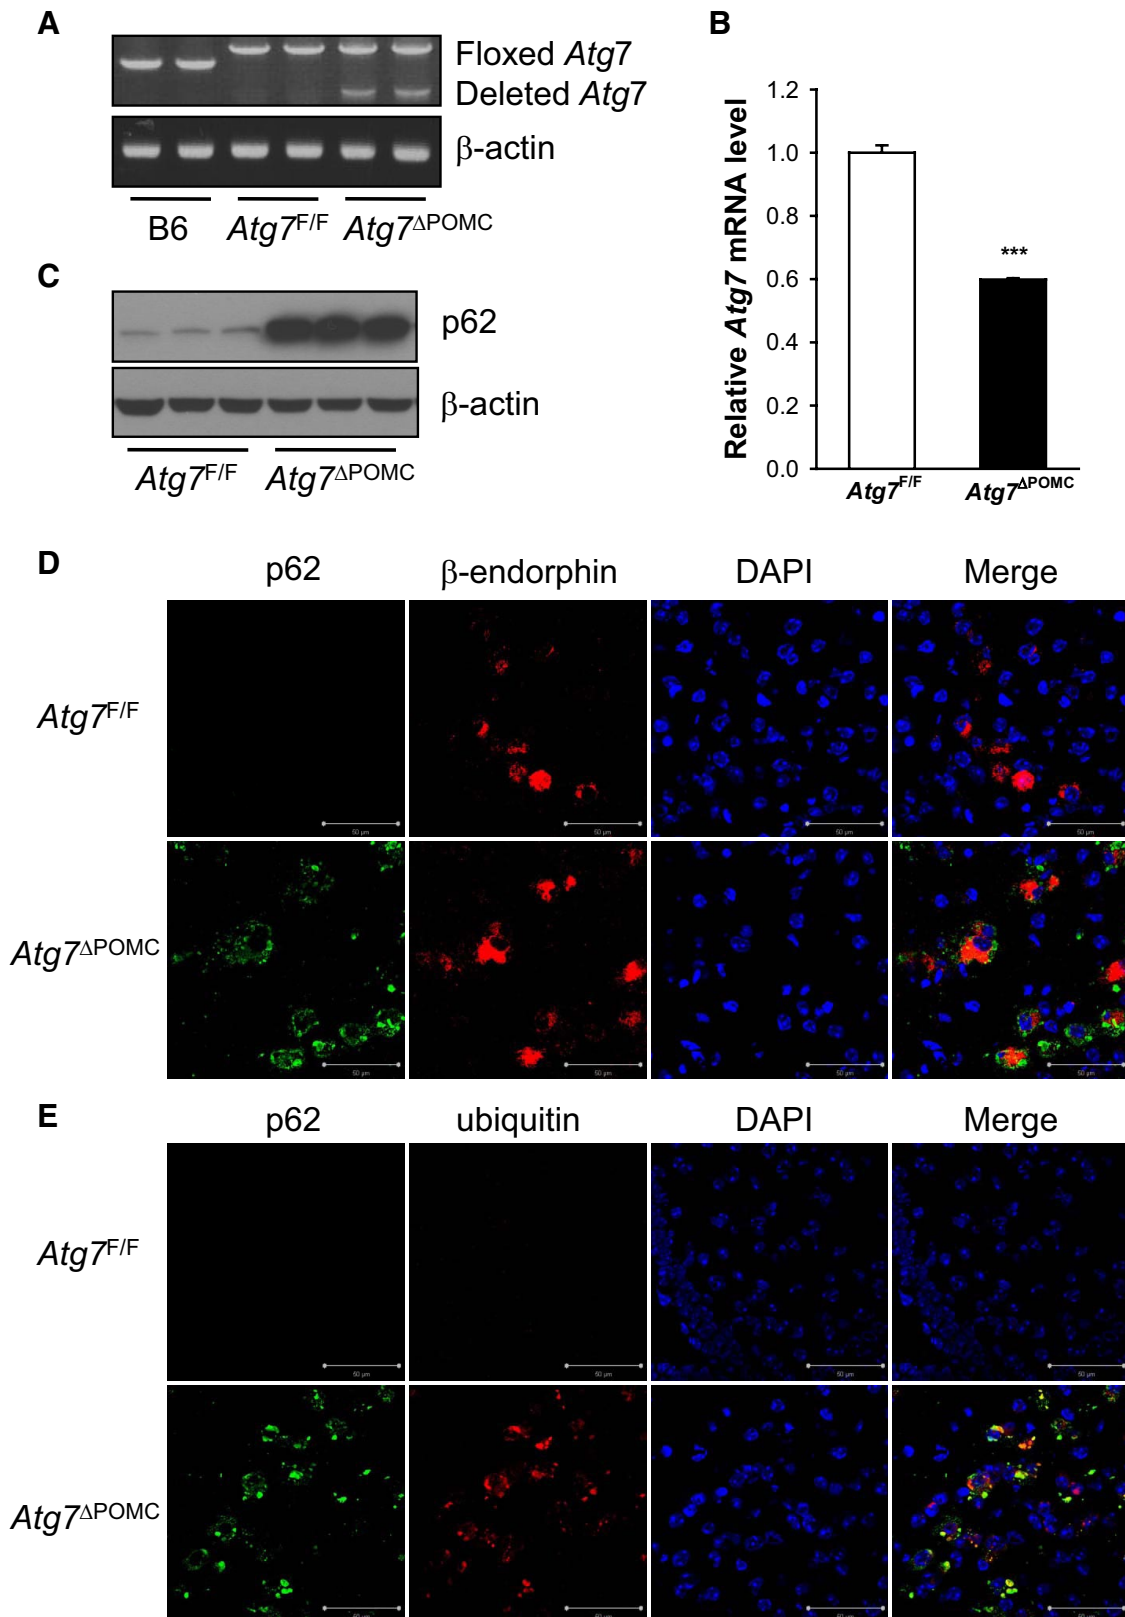

**FIG. 1.** Generation of *Atg7<sup>ΔPOMC</sup>* mice. A, *Atg7<sup>F/F</sup>* mice were crossed to POMC-Cre<sup>+</sup> mice to generate *Atg7<sup>ΔPOMC</sup>* mice. Genomic DNA prepared from the ARC was analyzed by PCR to detect floxed and deleted *Atg7* alleles (B6, C57BL/6). B, RNA was prepared from the ARC, and real-time RT-PCR was done using primers specific for *Atg7* (n = 2–4). C, Tissue lysates of the mediobasal hypothalamus were subjected to Western blotting using anti-p62 Ab. D and E, Colocalization of p62 and  $\beta$ -endorphin (D) or that of p62 and ubiquitin (E) was evaluated as described in *Materials and Methods* (\*\*\*,  $P < 0.001$ ). Scale bar, 50  $\mu$ m. DAPI, 4',6-diamidino-2-phenylindole.

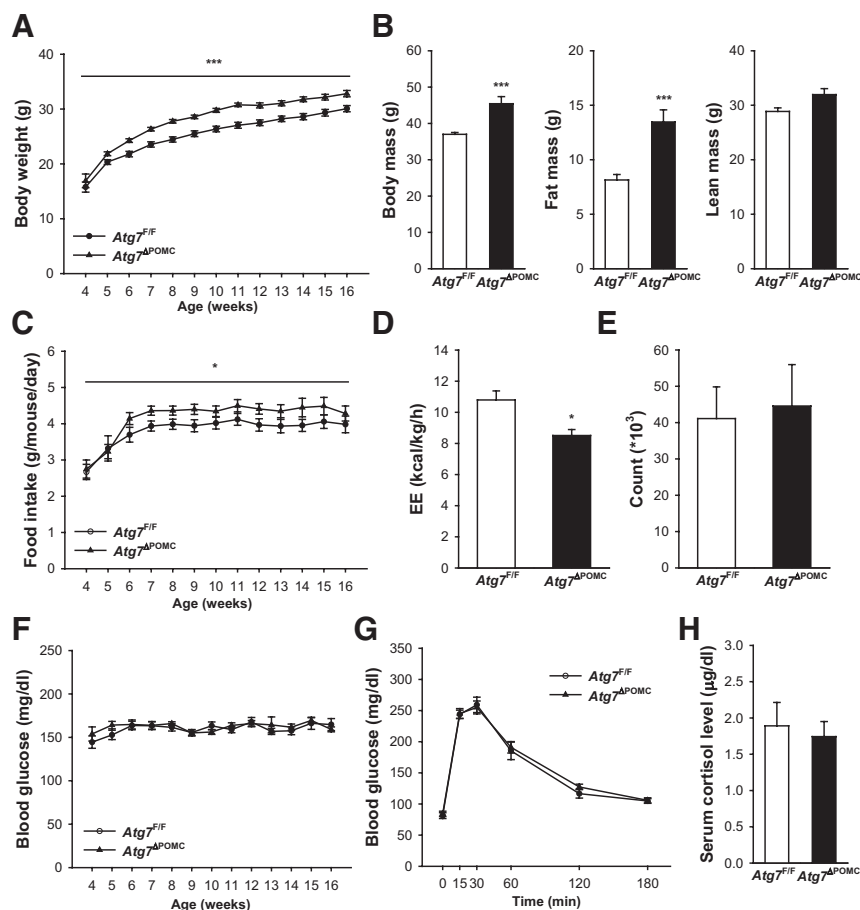

**FIG. 2.** Obesity of *Atg7 $\Delta$ POMC* mice. **A**, Body weight of male *Atg7 $\Delta$ POMC* and *Atg7<sup>F/F</sup>* mice fed normal chow diet was monitored up to 16 wk of age, and repeated-measures ANOVA was done ( $n = 22$ – $30$ ). **B**, Total body weight, fat mass, and lean body mass were evaluated at 20 wk of age using nuclear magnetic resonance analysis ( $n = 8$  each). **C**, Food intake was measured up to 16 wk of age, and repeated-measures ANOVA was done ( $n = 23$ – $31$ ). **D** and **E**, EE (**D**) and locomotor activity (**E**) were assessed at 20 wk of age in metabolic cages ( $n = 8$  each). **F**, Nonfasting blood glucose level of male *Atg7 $\Delta$ POMC* and *Atg7<sup>F/F</sup>* mice fed normal chow diet was monitored up to 16 wk of age ( $n = 23$ – $31$ ). **G**, IPGTT was done at 16 wk of age ( $n = 6$ – $7$ ). **H**, Serum cortisol level of fasted 20-wk-old mice was measured by RIA ( $n = 11$ – $14$ ; \*,  $P < 0.05$ ; \*\*\*,  $P < 0.001$ ).

effect of HFD on blood glucose profile of *Atg7 $\Delta$ POMC* mice. Although nonfasting blood glucose level was not different between *Atg7 $\Delta$ POMC* and *Atg7<sup>F/F</sup>* mice fed normal chow diet (Fig. 2F), nonfasting blood glucose level of *Atg7 $\Delta$ POMC* mice on HFD was higher compared with *Atg7<sup>F/F</sup>* mice on HFD by repeated-measures ANOVA using linear mixed model ( $P < 0.05$ ) (Fig. 3C). Further, linear mixed model analysis showed that the effect of HFD on nonfasting blood glucose level was significantly higher in *Atg7 $\Delta$ POMC* compared with *Atg7<sup>F/F</sup>* mice ( $P < 0.05$ ), showing interaction between glucose profile after HFD and hypothalamic autophagy status (Fig. 3D). These results suggest that autophagy deficiency in POMC neurons does not render animals more prone to HFD-induced weight gain but render them more susceptible to hyperglycemia after

HFD. However, blood glucose level of *Atg7 $\Delta$ POMC* mice on HFD did not reach diabetic level (Fig. 3C).

### Resistance to leptin in *Atg7 $\Delta$ POMC* mice

Increased food intake and body mass of *Atg7 $\Delta$ POMC* mice may be due to an impaired response of autophagy-deficient POMC neurons to leptin, because POMC neurons are the major targets of leptin. We thus studied changes in food intake and body weight after leptin challenge to overnight-fasted mice. In control *Atg7<sup>F/F</sup>* mice, icv leptin treatment dramatically reduced cumulative food intake during the 24-h postinjection period compared with saline injection as expected ( $P < 0.05$ ). In contrast, cumulative food intake was not changed by icv leptin administration to *Atg7 $\Delta$ POMC* mice between 1 and 24 h ( $P > 0.1$ ), suggesting that anorectic response to leptin was impaired in these mice relative to *Atg7<sup>F/F</sup>* mice that exhibited an intact response to leptin (Fig. 4A). Thus, food intake after leptin treatment was significantly higher in *Atg7 $\Delta$ POMC* mice compared with *Atg7<sup>F/F</sup>* mice between 1 and 24 h ( $P < 0.05$ ) (Fig. 4A). Further, gain of body weight during the 24-h postinjection period was significantly reduced by icv administration of leptin compared with saline injection in control mice ( $P < 0.05$ ) but not in *Atg7 $\Delta$ POMC* mice ( $P > 0.05$ ); thus, leptin failed to

suppress weight gain in *Atg7 $\Delta$ POMC* mice (Fig. 4B). Accordingly, weight gain after refeeding was significantly higher in leptin-treated *Atg7 $\Delta$ POMC* mice compared with control mice ( $P < 0.05$ ) (Fig. 4B). During the refeeding period, food intake and body weight gain in saline-injected *Atg7 $\Delta$ POMC* mice did not differ from those in saline-injected *Atg7<sup>F/F</sup>* mice, which may be due to stress from icv administration. ELISA showed that serum leptin concentration was markedly elevated in *Atg7 $\Delta$ POMC* mice compared with *Atg7<sup>F/F</sup>* mice ( $P < 0.01$ ), probably due to increased fat mass of *Atg7 $\Delta$ POMC* mice after impaired leptin sensitivity. In contrast, serum insulin level appeared elevated in *Atg7 $\Delta$ POMC* mice compared with *Atg7<sup>F/F</sup>* mice, also probably due to increased fat mass; however, the difference was not statistically significant ( $P > 0.05$ ) (Fig. 4C).

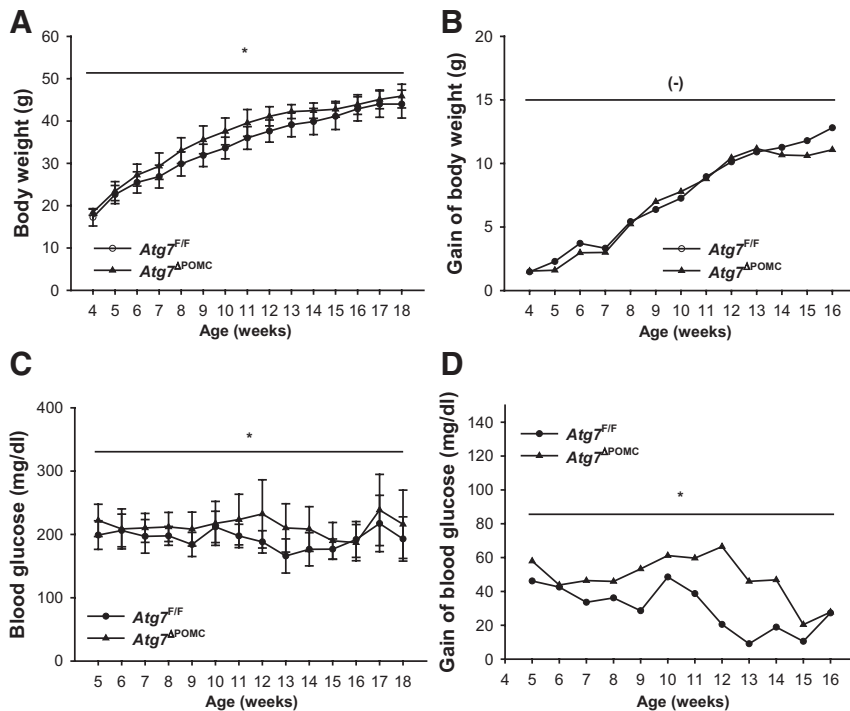

**FIG. 3.** Changes of body weight and glucose profile in *Atg7 $\Delta$ POMC* mice fed HFD. A, Body weight of male *Atg7 $\Delta$ POMC* and *Atg7<sup>F/F</sup>* mice fed HFD since 3.5 wk of age was monitored up to 18 wk of age, and repeated-measures ANOVA was done ( $n = 8-9$ ). B, Gain of body weight after HFD was plotted and compared between male *Atg7 $\Delta$ POMC* and *Atg7<sup>F/F</sup>* mice ( $n = 8-30$ ). C, Nonfasting blood glucose level of male *Atg7 $\Delta$ POMC* and *Atg7<sup>F/F</sup>* mice fed HFD since 3.5 wk of age was monitored up to 16 wk of age ( $n = 8-10$ ). D, Increases of nonfasting blood glucose level after HFD were plotted and compared between male *Atg7 $\Delta$ POMC* and *Atg7<sup>F/F</sup>* mice ( $n = 8-31$ ; \*,  $P < 0.05$ ).

### Mechanism of leptin resistance of autophagy-deficient POMC neurons

We next studied the mechanism underlying leptin unresponsiveness of autophagy-deficient POMC neurons. POMC mRNA expression in the ARC of *Atg7 $\Delta$ POMC* mice was not different from *Atg7<sup>F/F</sup>* mice in fasted state ( $P > 0.1$ ) (Fig. 5A). In refed state, POMC mRNA expression in the ARC of *Atg7<sup>F/F</sup>* mice was significantly increased compared with fasted state ( $P < 0.01$ ), similar to a previous paper (16–18). However, postprandial increase in ARC POMC mRNA expression was absent in *Atg7 $\Delta$ POMC* mice ( $P > 0.1$ ). Thus, postprandial POMC mRNA expression in *Atg7 $\Delta$ POMC* mice was significantly lower compared with *Atg7<sup>F/F</sup>* mice ( $P < 0.05$ ) (Fig. 5A), suggesting functional impairment of POMC neuron response to dietary changes. Next, we determined the number of hypothalamic POMC neurons in *Atg7 $\Delta$ POMC* mice to examine the role of autophagy in the viability of POMC neurons. Confocal microscopy showed that the number of POMC neurons in the hypothalamus of *Atg7 $\Delta$ POMC* mice was not significantly different from that in *Atg7<sup>F/F</sup>* mice ( $P > 0.05$ ) (Fig. 5B). TUNEL staining of hypothalamic sections from *Atg7 $\Delta$ POMC* mice did not reveal a detectable number of apoptotic POMC neurons (Supplemental Fig. 2), consis-

tent with the absence of the change in the POMC neuron number. Because these results suggested functional impairment of POMC neurons rather than a decrease in POMC neuron number, we studied intracellular signal transduction after leptin administration. Phosphorylation and nuclear translocation of STAT3 after icv leptin administration were markedly reduced in the hypothalamic POMC neurons of *Atg7 $\Delta$ POMC* mice compared with *Atg7<sup>F/F</sup>* mice ( $P < 0.001$ ) (Fig. 5C), suggesting that impaired cellular response to leptin was responsible for hyperphagia and increased body weight of *Atg7 $\Delta$ POMC* mice.

To unveil the mechanism underlying the impaired response to leptin, we studied activation of endoplasmic reticulum (ER) stress markers in the hypothalamus that could be affected by autophagy and influence leptin signaling (19, 20). Western blotting showed no differences in Bip and CHOP expression or eIF2 $\alpha$  phosphorylation in the hypothalamus of *Atg7 $\Delta$ POMC* mice compared with control mice (Supplemental Fig. 3), suggesting

that ER stress is not a cause of leptin resistance in *Atg7 $\Delta$ POMC* mice. Because Western blot analysis might not detect changes of ER stress markers that occur only in POMC neurons, we next conducted immunofluorescent staining of ER stress markers in the hypothalamus. Confocal microscopy revealed no induction of ER stress marker genes such as Bip or CHOP in the ARC of *Atg7 $\Delta$ POMC* mice compared with *Atg7<sup>F/F</sup>* mice, whereas strong induction of Bip and CHOP was observed in the liver of C57BL/6 mice 72 h after *in vivo* administration of 2 mg/kg tunicamycin (Sigma, St. Louis, MO) (Supplemental Fig. 4A). Further, accumulation of p-PERK or p-eIF2 $\alpha$ , markers of ER stress response, in the ARC was also not different between *Atg7 $\Delta$ POMC* and *Atg7<sup>F/F</sup>* mice, whereas massive accumulation of p-PERK and p-eIF2 $\alpha$  was noted in the liver 72 h after tunicamycin administration (Supplemental Fig. 4B). These results suggest that causes other than ER stress leads to leptin resistance associated with autophagy deficiency.

### Discussion

Using *Atg7 $\Delta$ POMC* mice, we demonstrated that autophagy is necessary for the physiologic function of POMC neu-

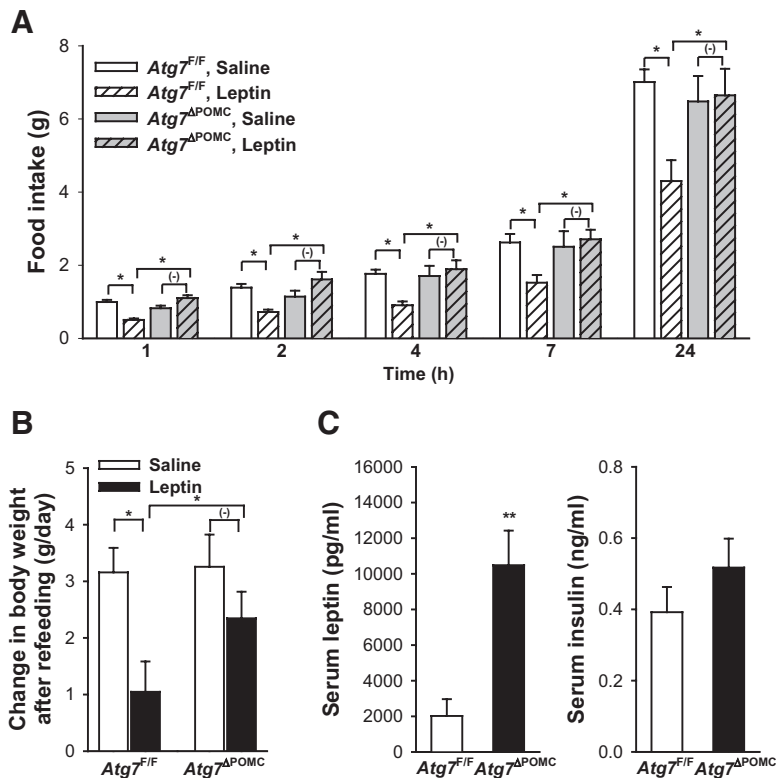

**FIG. 4.** Leptin unresponsiveness of *Atg7<sup>ΔPOMC</sup>* mice. **A**, After overnight fasting, 3  $\mu$ g of leptin or saline was administered icv. Cumulative food intake between 1 and 24 h after leptin injection was measured ( $n = 5-7$ ). **B**, After injection of leptin or saline as in **A**, changes in body weight 24 h after injection were measured ( $n = 5-7$ ). **C**, Serum levels of leptin ( $n = 20-31$ ) and insulin ( $n = 11-13$ ) in fasted 20-wk-old mice were determined by ELISA (\*,  $P < 0.05$ ; \*\*,  $P < 0.01$ ).

rons controlling energy balance. Given the important role of hypothalamic leptin signaling in the control of appetite and EE (9, 21), changes of body weight, food intake, and EE in *Atg7<sup>ΔPOMC</sup>* mice may be largely due to leptin unresponsiveness of autophagy-deficient POMC neurons. Increased body weight of *Atg7<sup>ΔPOMC</sup>* mice is similar to a report showing weight gain after delivery of shRNA against *Atg7* to the mediobasal hypothalamus (8), whereas *Atg7* shRNA was not specifically directed to POMC neurons in that paper. Weight gain in *Atg7<sup>ΔPOMC</sup>* mice with autophagy deficiency in POMC neurons that produce anorectic hormones is also in line with a decrease of body weight in mice with autophagy deficiency in agouti-related peptide neurons that produce orectic hormones (7). A significant increase in body weight was observed in male *Atg7<sup>ΔPOMC</sup>* mice but not in female *Atg7<sup>ΔPOMC</sup>* mice, which is probably due to the expression of estrogen receptors in hypothalamic neurons (22) and differential effect of estrogen on the hypothalamus (23). Despite the increase in body weight, glucose tolerance was not significantly changed in *Atg7<sup>ΔPOMC</sup>* mice on normal chow diet, which is similar to the absence of glucose intolerance in mice lacking leptin receptors in POMC neurons (13) and could be due to a mild degree of obesity in

*Atg7<sup>ΔPOMC</sup>* mice. Although there was no difference in the nonfasting blood glucose level between *Atg7<sup>ΔPOMC</sup>* mice and *Atg7<sup>F/F</sup>* mice fed normal chow diet, nonfasting blood glucose level of *Atg7<sup>ΔPOMC</sup>* mice fed HFD was significantly higher than that of *Atg7<sup>F/F</sup>* mice fed HFD, and the increase of nonfasting blood glucose level after HFD was higher in *Atg7<sup>ΔPOMC</sup>* mice compared with *Atg7<sup>F/F</sup>* mice. In contrast, weight gain after HFD was not different between *Atg7<sup>ΔPOMC</sup>* and *Atg7<sup>F/F</sup>* mice. These results suggest that autophagy deficiency in POMC neurons leads to increased susceptibility to hyperglycemia but not to weight gain after HFD.

Mammalian target of rapamycin (mTOR) signaling is a well-known negative regulator of autophagy (1). Thus, our data showing the role of hypothalamic autophagy in the control of energy balance are consistent with a previous report showing that POMC neuron-specific mTOR activation by deletion of tuberous sclerosis complex 1 (TSC1), an inhibitor of mTOR, induces hyperphagia (24). In contrast,

another paper reported that mTOR inhibition blunted the anorectic effect of leptin (25). Thus, mTOR/S6K1 signaling or nutrients inducing mTOR activation in the hypothalamus may affect other aspects of energy balance besides autophagy.

There was no significant effect of *Atg7* deletion on the number of POMC neurons, which differs from previous reports showing increased death of autophagy-deficient islet  $\beta$ -cells or cortical neurons (4, 26). Instead, abrogation of autophagy in POMC neurons led to impaired leptin-induced STAT3 phosphorylation. Attenuated POMC mRNA expression after refeeding in *Atg7<sup>ΔPOMC</sup>* mice might also be due to impaired STAT3 phosphorylation, because POMC induction depends on the intact leptin signaling (27). The mechanism of the impaired leptin-induced STAT3 phosphorylation is unclear. ER stress is not likely to be a cause of leptin resistance of autophagy-deficient POMC neurons, because we observed no induction of ER stress markers such as Bip or CHOP, and no accumulation of p-PERK or p-eIF2 $\alpha$  that are critical mediators of ER stress responses (28). NF- $\kappa$ B activation has been suggested as a mechanism linking hypothalamic autophagy deficiency to the reduced EE and increased body weight (8). Because NF- $\kappa$ B activation occurs in obesity (29, 30) and NF- $\kappa$ B activation has been reported to repress

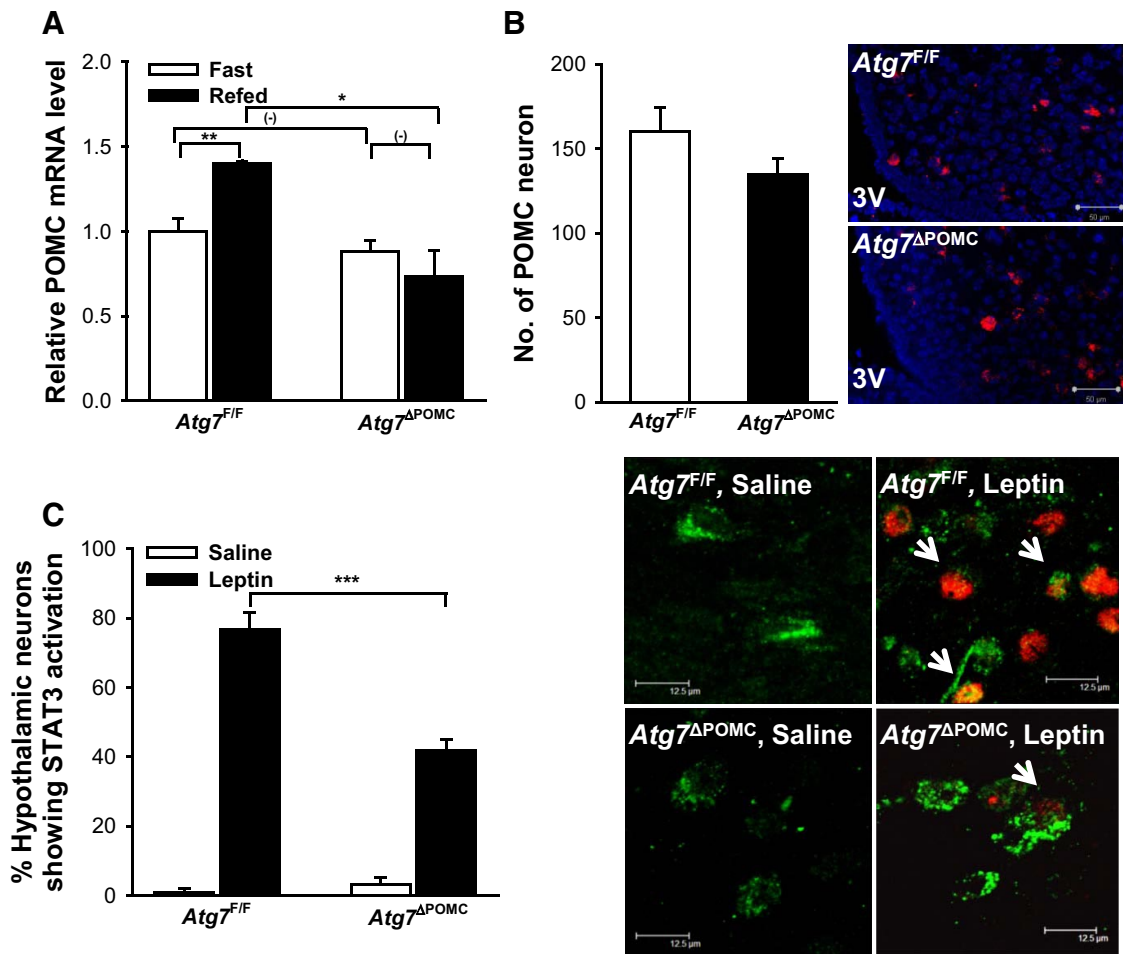

**FIG. 5.** Impaired leptin signaling in autophagy-deficient POMC neurons. **A**, RNA was prepared from the ARC of 16-wk-old mice after overnight fasting with or without refeeding for 3 h, and real-time RT-PCR was done ( $n = 3$  each). **B**, After staining with anti- $\beta$ -endorphin Ab and 4',6-diamidino-2-phenylindole staining, POMC neuron numbers in the rostral, middle, and caudal ARC were counted and summed ( $n = 4$  each) (left). Representative images are shown (right). 3V, Third ventricle. Scale bar, 50  $\mu\text{m}$ . **C**, After sequential immunofluorescent staining with anti- $\alpha$ -MSH Ab and anti-p-STAT3 Ab as the primary Ab, the percentage of POMC neurons showing nuclear p-STAT3 among total POMC neurons was calculated ( $n = 6$ –10) (left). Representative images are shown (right). Arrows indicate POMC neurons with nuclear p-STAT3. \*,  $P < 0.05$ ; \*\*\*,  $P < 0.001$ . Scale bar, 12.5  $\mu\text{m}$ .

autophagy (31, 32), NF- $\kappa$ B activation could also be an upstream event of autophagy deficiency and metabolic derangement after chronic HFD feeding. Although we presented evidence showing that autophagic process is abrogated by *Atg7* deletion in POMC neurons, such as accumulation of autophagic substrate p62, ubiquitin, and their colocalization, it is possible that nonautophagic function of *Atg7* might also be involved, because previous papers have shown nonapoptotic function of autophagy genes such as *Ulk1* in the neuronal signal transduction and axonal development (33). Because p62 is involved in diverse intracellular signal transduction systems (34, 35), massive accumulation of p62 observed in autophagy-deficient POMC neurons might also affect leptin signaling through unidentified signal pathways or disturbance of intracellular environment.

Although we focused on the leptin sensitivity of POMC neurons in the ARC of the hypothalamus, POMC and its cleavage products are also produced in corticotrophs of

the pituitary gland (15); however, serum cortisol level was not different between *Atg7<sup>ΔPOMC</sup>* and *Atg7<sup>F/F</sup>* mice, suggesting no significant effect of autophagy deficiency on the function of corticotrophs and no contribution of altered adrenocorticotrophic hormone axis in the weight gain of *Atg7<sup>ΔPOMC</sup>* mice. Although not addressed in this investigation, POMC neurons in the nucleus tractus solitarius of the hindbrain that have been reported to respond to leptin and participate in the regulation of energy homeostasis (36, 37) might also be affected by POMC neuron-specific autophagy deficiency and contribute to the altered leptin sensitivity and energy homeostasis of *Atg7<sup>ΔPOMC</sup>* mice.

We observed that constitutive autophagy is important for proper function of POMC neurons, and autophagy of POMC neurons plays an important role in the control of appetite or EE and leptin sensitivity or signaling. Autophagy deficiency in anorectic hypothalamic neurons, such as POMC neurons, may be a cause of obesity. Be-



cause autophagy may also affect viability and function of diverse hypothalamic neurons, further studies will be required to clarify the interaction between constitutive/adaptive autophagy in hypothalamic neurons and its role in hypothalamic control of appetite and energy balance.

## Acknowledgments

We thank Prof. T. S. Kim and J. H. Lee for their help in the statistical analysis. We also thank Jiyoung Kim for technical assistance.

Address all correspondence and requests for reprints to: Myung-Shik Lee, Department of Medicine, Samsung Medical Center, Sungkyunkwan University School of Medicine, 50 Irwon-dong Kangnam-ku, Seoul 135-710, Korea. E-mail: mslee0923@skku.edu; or Min-Seon Kim, Department of Internal Medicine, Asan Medical Center, University of Ulsan College of Medicine, Seoul 138-736, Korea. E-mail: mskim@amc.seoul.kr.

This work was supported by the Bio R&D Program 2008-04090 (to M.-S.L.), the Korea Healthcare Technology R&D Projects (Ministry for Health, Welfare, and Family Affairs, Korea) A080967 (to M.-S.L.) and A084651 (to C.S.C.), and the National Research Foundation of Korea Grants 2009-0079566 and 2007-0056866 (to M.-S.K.). M.-S.L. is the recipient of the Global Research Laboratory Grant K21004000003-10A0500-00310 of the National Research Foundation of Korea and of the 21C Frontier Functional Proteomics Project of the Korean Ministry of Science and Technology Grant FPR08B1-210).

Disclosure Summary: The authors have nothing to disclose.

## References

- Klionsky DJ, Emr SD 2000 Autophagy as a regulated pathway of cellular degradation. *Science* 290:1717–1721
- Komatsu M, Waguri S, Ueno T, Iwata J, Murata S, Tanida I, Ezaki J, Mizushima N, Ohsumi Y, Uchiyama Y, Kominami E, Tanaka K, Chiba T 2005 Impairment of starvation-induced and constitutive autophagy in Atg7-deficient mice. *J Cell Biol* 169:425–434
- Ebato C, Uchida T, Arakawa M, Komatsu M, Ueno T, Komiya K, Azuma K, Hirose T, Tanaka K, Kominami E, Kawamori R, Fujitani Y, Watada H 2008 Autophagy is important in islet homeostasis and compensatory increase of  $\beta$  cell mass in response to high-fat diet. *Cell Metab* 8:325–332
- Jung HS, Chung KW, Won Kim J, Kim J, Komatsu M, Tanaka K, Nguyen YH, Kang TM, Yoon KH, Kim JW, Jeong YT, Han MS, Lee MK, Kim KW, Shin J, Lee MS 2008 Loss of autophagy diminishes pancreatic  $\beta$ -cell mass and function with resultant hyperglycemia. *Cell Metab* 8:318–324
- Singh R, Xiang Y, Wang Y, Baikati K, Cuervo AM, Luu YK, Tang Y, Pessin JE, Schwartz GJ, Czaja MJ 2009 Autophagy regulates adipose mass and differentiation in mice. *J Clin Invest* 119:3329–3339
- Zhang Y, Goldman S, Baerga R, Zhao Y, Komatsu M, Jin S 2009 Adipose-specific deletion of autophagy-related gene 7 (atg7) in mice reveals a role in adipogenesis. *Proc Natl Acad Sci USA* 106:19860–19865
- Kaushik S, Rodriguez-Navarro JA, Arias E, Kiffin R, Sahu S, Schwartz GJ, Cuervo AM, Singh R 2011 Autophagy in hypothalamic AgRP neurons regulates food intake and energy balance. *Cell Metab* 14:173–183
- Meng Q, Cai D 2011 Defective hypothalamic autophagy directs the central pathogenesis of obesity via IKK- $\beta$ /NF- $\kappa$ B pathway. *J Biol Chem* 286:32324–32332
- Halaas JL, Boozer C, Blair-West J, Fidathusein N, Denton DA, Friedman JM 1997 Physiological response to long-term peripheral and central leptin infusion in lean and obese mice. *Proc Natl Acad Sci USA* 94:8878–8883
- Kim MS, Pak YK, Jang PG, Namkoong C, Choi YS, Won JC, Kim KS, Kim SW, Kim HS, Park JY, Kim YB, Lee KU 2006 Role of hypothalamic Foxo1 in the regulation of food intake and energy homeostasis. *Nature Neurosci* 9:901–906
- Choi CS, Savage DB, Abu-Elheiga L, Liu ZX, Kim S, Kulkarni A, Distefano A, Hwang YJ, Reznick RM, Codella R, Zhang D, Cline GW, Wakil SJ, Shulman GI 2007 Continuous fat oxidation in acetyl-CoA carboxylase 2 knockout mice increases total energy expenditure, reduces fat mass, and improves insulin sensitivity. *Proc Natl Acad Sci USA* 104:16480–16485
- Ramadori G, Fujikawa T, Fukuda M, Anderson J, Morgan DA, Mostoslavsky R, Stuart RC, Perello M, Vianna CR, Nillni EA, Rahmouni K, Coppari R 2010 SIRT1 deacetylase in POMC neurons is required for homeostatic defenses against diet-induced obesity. *Cell Metab* 12:78–87
- Balthasar N, Coppari R, McMinn J, Liu SM, Lee CE, Tang V, Kenny CD, McGovern RA, Chua Jr SC, Elmquist JK, Lowell BB 2004 Leptin receptor signaling in POMC neurons is required for normal body weight homeostasis. *Neuron* 42:983–991
- Komatsu M, Waguri S, Koike M, Sou YS, Ueno T, Hara T, Mizushima N, Iwata J, Ezaki J, Murata S, Hamazaki J, Nishito Y, Iemura S, Natsume T, Yanagawa T, Uwayama J, Warabi E, Yoshida H, Ishii T, Kobayashi A, Yamamoto M, Yue Z, Uchiyama Y, Kominami E, Tanaka K 2007 Homeostatic levels of p62 control cytoplasmic inclusion body formation in autophagy-deficient mice. *Cell* 131:1149–1163
- Miller R, Aaron W, Toneff T, Vishnuvardhan D, Beinfeld MC, Hook VY 2003 Obliteration of  $\alpha$ -melanocyte-stimulating hormone derived from POMC in pituitary and brains of PC2-deficient mice. *J Neurochem* 86:556–563
- Hagan MM, Rushing PA, Schwartz MW, Yagaloff KA, Burn P, Woods SC, Seeley RJ 1999 Role of the CNS melanocortin system in the response to overfeeding. *J Neurosci* 19:2362–2367
- Mizuno TM, Makimura H, Silverstein J, Roberts JL, Lopingco T, Mobbs CV 1999 Fasting regulates hypothalamic neuropeptide Y, agouti-related peptide, and proopiomelanocortin in diabetic mice independent of changes in leptin or insulin. *Endocrinology* 140:4551–4557
- Schwartz MW, Seeley RJ, Woods SC, Weigle DS, Campfield LA, Burn P, Baskin DG 1997 Leptin increases hypothalamic pro-opiomelanocortin mRNA expression in the rostral arcuate nucleus. *Diabetes* 46:2119–2123
- Ozcan L, Ergin AS, Lu A, Chung J, Sarkar S, Nie D, Myers Jr MG, Ozcan U 2009 Endoplasmic reticulum stress plays a central role in development of leptin resistance. *Cell Metab* 9:35–51
- Zhang X, Zhang G, Zhang H, Karin M, Bai H, Cai D 2008 Hypothalamic IKK $\beta$ /NF- $\kappa$ B and ER stress link overnutrition to energy imbalance and obesity. *Cell* 135:61–73
- Minokoshi Y, Alquier T, Furukawa N, Kim YB, Lee A, Xue B, Mu J, Foufelle F, Ferré P, Birnbaum MJ, Stuck BJ, Kahn BB 2004 AMP-kinase regulates food intake by responding to hormonal and nutrient signals in the hypothalamus. *Nature* 428:569–574
- Barros RP, Gustafsson JÅ 2011 Estrogen receptors and the metabolic networks. *Cell Metab* 14:289–299
- Mystkowski P, Seeley RJ, Hahn TM, Baskin DG, Havel PJ, Matsu-moto AM, Wilkinson CW, Peacock-Kinzig K, Blake KA, Schwartz MW 2000 Hypothalamic melanin-concentrating hormone and estrogen-induced weight loss. *J Neurosci* 20:8637–8642

24. Mori H, Inoki K, Münzberg H, Opland D, Faouzi M, Villanueva EC, Ikenoue T, Kwiatkowski D, MacDougald OA, Myers Jr MG, Guan KL 2009 Critical role for hypothalamic mTOR activity in energy balance. *Cell Metab* 9:362–374
25. Cota D, Proulx K, Smith KA, Kozma SC, Thomas G, Woods SC, Seeley RJ 2006 Hypothalamic mTOR signaling regulates food intake. *Science* 312:927–930
26. Komatsu M, Waguri S, Chiba T, Murata S, Iwata J, Tanida I, Ueno T, Koike M, Uchiyama Y, Kominami E, Tanaka K 2006 Loss of autophagy in the central nervous system causes neurodegeneration in mice. *Nature* 441:880–884
27. Münzberg H, Huo L, Nillni EA, Hollenberg AN, Bjørbaek C 2003 Role of signal transducer and activator of transcription factor 3 in regulation of hypothalamic proopiomelanocortin gene expression by leptin. *Endocrinology* 144:2121–2131
28. Walter P, Ron D 2011 The unfolded protein response: from stress pathway to homeostatic regulation. *Science* 334:1081–1086
29. Arkan MC, Hevener AL, Greten FR, Maeda S, Li ZW, Long JM, Wynshaw-Boris A, Poli G, Olefsky J, Karin M 2005 IKK- $\beta$  links inflammation to obesity-induced insulin resistance. *Nat Med* 11:191–198
30. Cai D, Yuan M, Frantz DF, Melendez PA, Hansen L, Lee J, Shoelson SE 2005 Local and systemic insulin resistance resulting from hepatic activation of IKK- $\beta$  and NF- $\kappa$ B. *Nat Med* 11:183–190
31. Djavaheri-Mergny M, Amelotti M, Mathieu J, Besançon F, Bauvy C, Souquère S, Pierron G, Codogno P 2006 NF- $\kappa$ B activation represses tumor necrosis factor- $\alpha$ -induced autophagy. *J Biol Chem* 281:30373–30382
32. Fabre C, Carvalho G, Tasdemir E, Braun T, Adès L, Grosjean J, Boehrer S, Métivier D, Souquère S, Pierron G, Fenaux P, Kroemer G 2007 NF- $\kappa$ B inhibition sensitizes to starvation-induced cell death in high-risk myelodysplastic syndrome and acute myeloid leukemia. *Oncogene* 26:4071–4083
33. Zhou X, Babu JR, da Silva S, Shu Q, Graef IA, Oliver T, Tomoda T, Tani T, Wooten MW, Wang F 2007 Unc-51-like kinase 1/2-mediated endocytic processes regulate filopodia extension and branching of sensory axons. *Proc Natl Acad Sci USA* 104:5842–5847
34. Kim JY, Ozato K 2009 The sequestosome 1/p62 attenuates cytokine gene expression in activated macrophages by inhibiting IFN regulatory factor 8 and TNF receptor-associated factor 6/NF- $\kappa$ B activity. *J Immunol* 182:2131–2140
35. Moscat J, Diaz-Meco MT, Wooten MW 2007 Signal integration and diversification through the p62 scaffold protein. *Trends Biochem Sci* 32:95–100
36. Ellacott KL, Halatchev IG, Cone RD 2006 Characterization of leptin-responsive neurons in the caudal brainstem. *Endocrinology* 147:3190–3195
37. Grill HJ, Schwartz MW, Kaplan JM, Foxhall JS, Breininger J, Baskin DG 2002 Evidence that the caudal brainstem is a target for the inhibitory effect of leptin on food intake. *Endocrinology* 143:239–246

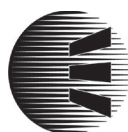

THE  
ENDOCRINE  
SOCIETY®

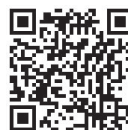

Members have FREE online access to  
current endocrine *Clinical Practice Guidelines*.

[www.endo-society.org/guidelines](http://www.endo-society.org/guidelines)
